1     **Detection and Classification of Cardiac Arrhythmias by a Challenge-Best Deep Learning**  
2                                     **Neural Network Model**

3                     Tsai-Min Chen<sup>1‡</sup>, Chih-Han Huang<sup>1,2‡</sup>, Edward S. C. Shih<sup>1‡</sup>, Yu-Feng Hu<sup>1,3,4</sup>,  
4                                     Ming-Jing Hwang<sup>1,2\*</sup>

5  
6  
7     <sup>1</sup>Institute of Biomedical Sciences, Academia Sinica, Taipei, Taiwan; <sup>2</sup>Genome and Systems  
8     Biology Degree Program, Academia Sinica and National Taiwan University, Taipei, Taiwan;  
9     <sup>3</sup>Division of Cardiology, Department of Medicine, Taipei Veterans General Hospital, Taipei,  
10    Taiwan; <sup>4</sup>Institute of Clinical Medicine and Cardiovascular Research Institute, National Yang-  
11    Ming University, Taipei, Taiwan. ‡ Tsai-Min Chen, Chih-Han Huang and Edward S. C. Shih are  
12    joint first authors

13    \*mjhwang@ibms.sinica.edu.tw

14  
15    Short title: AI diagnosis of cardiac arrhythmias

16  
17    **Abstract**

18    **Background:** Electrocardiogram (ECG) is widely used to detect cardiac arrhythmia (CA) and  
19    heart diseases. The development of deep learning modeling tools and publicly available large  
20    ECG data in recent years has made accurate machine diagnosis of CA an attractive task to  
21    showcase the power of artificial intelligence (AI) in clinical applications.

22    **Methods and Findings:** We have developed a convolution neural network (CNN)-based model  
23    to detect and classify nine types of heart rhythms using a large 12-lead ECG dataset (6877

24 recordings) provided by the China Physiological Signal Challenge (CPSC) 2018. Our model  
25 achieved a median overall F1-score of 0.84 for the 9-type classification on CPSC2018's hidden  
26 test set (2954 ECG recordings), which ranked first in this latest AI competition of ECG-based  
27 CA diagnosis challenge. Further analysis showed that concurrent CAs observed in the same  
28 patient were adequately predicted for the 476 patients diagnosed with multiple CA types in the  
29 dataset. Analysis also showed that the performances of using only single lead data were only  
30 slightly worse than using the full 12 lead data, with leads aVR and V1 being the most prominent.  
31 These results are extensively discussed in the context of their agreement with and relevance to  
32 clinical observations.

33 **Conclusions:** An AI model for automatic CA diagnosis achieving state-of-the-art accuracy was  
34 developed as the result of a community-based AI challenge advocating open-source research. In-  
35 depth analysis further reveals the model's ability for concurrent CA diagnosis and potential use  
36 of certain single leads such as aVR in clinical applications.

37  
38 **Abbreviations:** CA, cardiac arrhythmia; AF, Atrial fibrillation; I-AVB, first-degree  
39 atrioventricular block; LBBB, left bundle branch block; RBBB, right bundle branch block; PAC,  
40 premature atrial contraction; PVC, premature ventricular contraction; STD, ST-segment  
41 depression; STE, ST-segment elevation.

42

## 43 **Introduction**

44 Cardiac arrhythmias (CAs) are harbingers of cardiovascular diseases and could cause  
45 deaths [1]. CAs are diagnosed by electrocardiogram (ECG), a non-invasive, inexpensive and  
46 widely applied clinical method to monitor heart activities. To diagnose CAs, the wave-like

47 features known as P wave, QRS wave, T wave, etc. of ECG are examined. A complete ECG  
48 usually contains recordings from six limb leads (I, II, III, aVR, aVL, aVF) and six chest leads  
49 (V1, V2, V3, V4, V5, V6), with each lead measuring electrical activity from a different angle of  
50 the heart on both the vertical plane (for limb leads) and the horizontal plane (for chest leads) [2,  
51 3].

52 These different leads exhibit distinct features of ECG signals associated with specific types  
53 of CA. The following are some examples. Atrial fibrillation (AF) is characterized by the  
54 fibrillatory atrial waves and irregular conduction of QRS [4, 5]. Left bundle branch block (LBBB)  
55 is diagnosed by the distinct QRS morphology at leads I, aVL, V1, V2, V5, and V6, while right  
56 bundle branch block (RBBB) is diagnosed by the rsR' pattern at V1 and V2 [6]. First-degree  
57 atrioventricular block (I-AVB) is defined as constant PR intervals longer than 0.2 second [7].  
58 The premature atrial contraction (PAC) and premature ventricular contraction (PVC) indicate  
59 the electrical impulse from an abnormal site: Namely, the P wave or QRS morphology of PAC  
60 and PVC is different from those in normal heart beats [8, 9]. ST segment is abnormal if ST-  
61 segment elevation (STE) is greater than 0.1 mV or ST-segment depression (STD) is greater than  
62 0.1 mV [10].

63 To reliably recognize these complex CA-associated ECG characteristics, considerable  
64 training is required. Indeed, studies have shown that internists or cardiologists sometimes  
65 misdiagnosed CA types [11, 12]. The significant growth of ECG examination which increases  
66 physician's workload and burnout aggravates the problem. This problem can be alleviated by  
67 developing computer algorithms to assist the physician with accurate and automatic diagnosis.

68 Although such a task is difficult owing to the large variance in the geometrical and physiological  
69 features of ECG signals [13], significant progress has been made, especially in recent years [14].

70 There are generally two approaches to develop an automatic CA diagnostic tool. The first  
71 one would split ECG signals into the units of the heartbeat, or cycles of the characteristic ECG  
72 waveforms. Thus, even with a small number of subjects, this beat-based approach can generate a  
73 large amount of beat data for machine learning to train predictive classification models. However,  
74 extracting ECG morphological features to delineate ECG signals proves challenging, as it is  
75 often an imprecise undertaking [14]. And while prediction accuracies as high as >99% have been  
76 reported in beat-based studies, they could be masked by the fact that both training and test beats  
77 can come from the same individual. As a result in one study, when test beats were taken from  
78 patients not included in the training set, the cross validation accuracy of a six types CA  
79 classification decreased from 99.7% to 81.5% [15].

80 The MIT-BIH Arrhythmia Database (MIT-BIH AD) [16, 17] and the UCI Machine  
81 Learning Repository: Arrhythmia Data Set (UCIAD) [18], which respectively contain only 48  
82 and 452 subjects, have been the source of publicly available ECG data for most of previous CA  
83 prediction studies. However, databases of a small number of subjects such as these two would  
84 tend to cause over-fitting problems for classification, especially for neural network algorithms  
85 [19]. Data over-fitting would also arise from significantly unbalanced data, i.e., data being  
86 unproportionally concentrated in one or few CA types. These are problems that can produce  
87 biased results when analyzing MIT-BIH AD and UCIAD [20, 21]. For instance, in a study  
88 analyzing UCIAD, a high accuracy (92%) of CA classification was achieved when data were  
89 split into 80% in the training set and 20% in the test set, but the accuracy dropped to only 60%

90 when the training-test splitting was 50-50 [20]. Additional drawbacks of using the two databases  
91 are that ECG data only included two leads (e.g. leads II and V1, II and V5, II and V4, and V2  
92 and V4) in MIT-BIH AD, and only extracted features (average width of Q, amplitude of Q, etc.)  
93 but not the raw data of 12-lead ECG are available in UCIAD.

94 The second approach provides an end-to-end solution, avoiding the main difficulty of the  
95 beat-based approach. This requires a very large ECG database as well as the construction of a  
96 suitable deep learning artificial neural network to take advantage of the large database.  
97 Developments on both aspects in recent years have made the second approach increasingly  
98 attractive. For example, to promote open-source research, the PhysioNet/Computing in  
99 Cardiology Challenge 2017 (CinC2017) released single-lead (lead I) ECG data of 8,528 subjects  
100 with four labeled CA types (AF, normal, other rhythms, noise) to the public [22]. Using  
101 convolutional neural network (CNN) plus 3 layers of long short-term memory (LSTM, one kind  
102 of recurrent neural network (RNN)), Xiong et al. produced the top performance of CinC2017  
103 with an F1 score (the harmonic mean of the precision and recall) of 0.82 on its hidden test set  
104 (3,658 subjects) [23].

105 As CinC2017, The China Physiological Signal Challenge 2018 (CPSC2018) hosted by the  
106 7th International Conference on Biomedical Engineering and Biotechnology [24] released a large  
107 ECG database for free download and set aside a hidden test set to assess models submitted by  
108 challenge participants from around the world. Different from CinC2017, the ECG data of  
109 CPSC2018 were 12-lead and subjects were grouped into normal and eight types of CA: AF, I-  
110 AVB, LBBB, RBBB, PAC, PVC, STD, and STE. This represents the biggest 12-lead ECG  
111 database with the most labeled CA types in the public domain to date. Here, we report a deep

112 learning artificial neural network modeling of the CPSC2018 ECG data, and the results that won  
113 the first place in the competition.

114

## 115 **Methods**

116 The CPSC2018 ECG database has been described in detail by Liu and coworkers [24].  
117 Briefly, a total of 9831 12-lead ECG recordings from 9458 individuals were collected from  
118 eleven hospitals in China. The ECG was sampled by a frequency of 500 Hertz for a few seconds  
119 to a minute, with a few exceptions including one lasting as long as 144 seconds. Each recording  
120 was also labeled as the normal type or eight abnormal CA types as mentioned above. The  
121 database was divided by a random 70-30 training-test split, and only the training set was made  
122 available to the public. Gender and age distribution between the training set and the test set were  
123 fairly balanced, so were the distributions of the subjects from the eleven hospitals and the CA  
124 types [25]. Of the 6877 training-set recordings, 470 received two CA-type labels and 6 received  
125 three.

126 Our model was built on a combined architecture of five CNN blocks, followed by a  
127 bidirectional gated recurrent unit (GRU), an attention layer [26, 27], and finally a dense, i.e. fully  
128 connected, layer (Fig 1). Within each CNN block there were two convolution layers and they  
129 were followed by a pooling layer to reduce the amount of parameters and computation in the  
130 network and control over-fitting [28]. Furthermore, between these CNN blocks or between other  
131 independent layers, including the one between the last CNN block and the bidirectional GRU  
132 layer, we randomly dropped 20% of their connections. We chose to use CNN and RNN because  
133 of their demonstrated ability to handle noisy signals and time series data in studies which

134 included ECG classification [29, 30]. GRU is a new form of RNN proposed recently that can  
135 require less training time and less number of iterations than LSTM [31, 32]. We used batch  
136 normalization to adjust and scale the input from the attention layer, which determines a vector of  
137 importance weights, to the dense layer [33]. LeakyReLU activation function, a leaky version of  
138 Rectified Linear Unit, was used for each layer, except for the dense layer, where Sigmoid  
139 activation function was used [34].

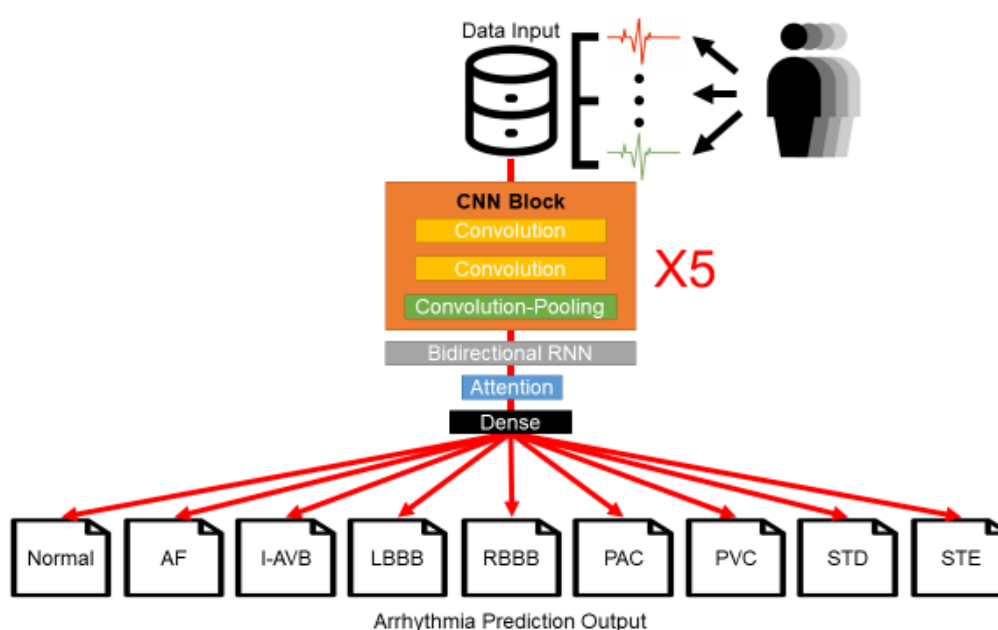

140

141 **Fig 1. The architecture of deep learning artificial neural network for 12-lead ECG CA**  
142 **detection and classification.**

143 Layers and blocks are specified in rectangle boxes; “X5” indicates that five convolution neural network  
144 (CNN) blocks are tandem-connected before connecting to the bidirectional recurrent neural network  
145 (RNN) layer, which is a GRU layer. The output layer at bottom contains the probabilities predicted by the  
146 model for each of the nine types of the CA classification. The type with the highest probability is the type  
147 predicted by the model for the input ECG recording.

148

149         In our implementation, the CPSC2018 ECG data were processed into a matrix of three  
150 elements: the first is the subject ID, the second identifies which of the ECG's 12 leads being  
151 considered, and the third contains its 72,000 ECG values, which correspond to the recordings  
152 taken by the maximum recording time (144 seconds) and on a frequency of 500 Hertz. We  
153 padded zeroes up front for any recording that was less than the maximum time. The 476 multi-  
154 labeled subjects were extracted when the rest of 6,401 subjects were randomly divided into 10  
155 equal parts to set up an 8-1-1 train, validation and test scheme of machine learning. The extracted  
156 multi-labeled subjects were then added back to be included for the training. Our classification  
157 training was carried out using categorical-cross-entropy loss function and ADAM optimizer in  
158 the GPU version of TensorFlow from the Keras package [35-37]. Models were evaluated on their  
159 performance on the validation set for 100 training epochs (an epoch refers to one cycle through  
160 the full training dataset in artificial neural network learning). The best model, the one with the  
161 smallest loss on the validation set, was further evaluated by computing its F1-score on the test set.  
162 The procedure was repeated 10 times to complete the 10-fold training and validation plus test to  
163 produce 10 best validation models. The median F1-score for each CA label, including the normal  
164 type, for the 10 test sets was calculated using the F1-score package from Scikit-learn [38].

165         We further investigated the performance of using only single lead data. To do that, for a  
166 given lead we simply assigned zero to all the ECG values of the other 11 leads and derived the  
167 model using the same network architecture and the same 10-fold cross validation plus test  
168 procedure described above. This resulted in 120 best single-lead validation models and a median  
169 F1-score for each of the 12 single leads on each of the nine CA labels.



170 To compete for CPSC2018, the 130 best validation models (10 from full-lead training and  
171 120 from single-lead training) were combined into one ensemble model by which the average of  
172 the output probabilities from the 130 models for each CA type was adjusted by a weight vector  
173 to produce the final probability for that CA type. The weights of the vector were optimized by  
174 genetic algorithm [39] to produce the best overall median F1-score on the 10 test sets. Given an  
175 input of an ECG recording, the CA type receiving the largest probability from the ensemble  
176 model would then be the type of CA predicted for that ECG recording. The ensemble model was  
177 our model submitted to CPSC2018, its performances on the hidden test set (2954 recordings) as  
178 computed and reported by CPSC2018 organizers are presented in Table 1.

## 179 **Results**

180

### 181 **(1) Best validation models on 10-fold tests and ensemble model on hidden test**

182 In Table 1, for each CA type the median accuracy, AUC (area under the receiver operating  
183 characteristic curve) and F1-score for the ten 10-fold tests from the best validation models are  
184 compared with those of the ensemble model, as well as with the F1-score of the ensemble model  
185 on the hidden test set of CPSC2018. The comparisons show that the ensemble model performed  
186 somewhat better than the best validation models, which is expected because the former combined  
187 and optimized the latter to produce the best 10-fold test results (see Methods). In addition, the  
188 ensemble model's performance was quite stable across all CA types going from the publicly  
189 available data to the hidden test data, reflecting the fairly similar compositions of the two sets of  
190 data, as mentioned above.

191

192 **Table 1: Comparison of model performances on tests\***

| CA Type | Best Validation Models |                        |                 | Ensemble Model  |                        |                 | <b>Hidden Set<br/>F1-score</b> |
|---------|------------------------|------------------------|-----------------|-----------------|------------------------|-----------------|--------------------------------|
|         | Median Accuracy        | Median AUC (95% CI)    | Median F1-score | Median Accuracy | Median AUC (95% CI)    | Median F1-score |                                |
| Normal  | 0.940                  | 0.890<br>(0.810-0.942) | 0.795           | 0.949           | 0.867<br>(0.832-0.973) | 0.808           | <b>0.801</b>                   |
| AF      | 0.969                  | 0.928<br>(0.902-0.985) | 0.897           | 0.983           | 0.963<br>(0.914-0.993) | 0.944           | <b>0.933</b>                   |
| I-AVB   | 0.972                  | 0.899<br>(0.864-0.988) | 0.865           | 0.977           | 0.950<br>(0.875-0.990) | 0.899           | <b>0.875</b>                   |
| LBBB    | 0.990                  | 0.914<br>(0.748-1.000) | 0.821           | 0.995           | 0.942<br>(0.763-1.000) | 0.899           | <b>0.884</b>                   |
| RBBB    | 0.955                  | 0.956<br>(0.887-0.988) | 0.911           | 0.952           | 0.946<br>(0.871-0.976) | 0.903           | <b>0.910</b>                   |
| PAC     | 0.957                  | 0.867<br>(0.749-0.955) | 0.734           | 0.963           | 0.920<br>(0.779-0.981) | 0.797           | <b>0.826</b>                   |
| PVC     | 0.970                  | 0.928<br>(0.841-0.988) | 0.852           | 0.977           | 0.932<br>(0.864-0.996) | 0.874           | <b>0.869</b>                   |
| STD     | 0.951                  | 0.878<br>(0.797-0.972) | 0.788           | 0.959           | 0.906<br>(0.815-0.970) | 0.834           | <b>0.811</b>                   |
| STE     | 0.976                  | 0.707<br>(0.558-0.995) | 0.509           | 0.977           | 0.773<br>(0.603-0.993) | 0.600           | <b>0.624</b>                   |

193 \*These are results of the best validation models and the ensemble model on the ten 10-fold tests, except for those in the last column  
 194 (boldfaced), which are the ensemble model's median F1-scores for the hidden test set of CPSC2018 reported at its website  
 195 <http://2018.icbeb.org/Challenge.html>, which did not provide accuracy and AUC results.

196

197 Table 1 also reveals differential difficulties in predicting these CA types. Namely, the  
198 prediction accuracy decreased from AF, bundle branch blocks, premature contractions to ST  
199 abnormalities, with the normal type being one of the more difficult-to-predict types. The model's  
200 prediction for STE had the lowest F1-score (0.5~0.6), which may due in part to physician's  
201 variable opinions on how to diagnose STE [40]. The same trend, including the prediction of the  
202 normal type, was observed in all other top-performing models of CPSC2018 (S1 Table). Indeed,  
203 almost all the top models produced very high F1-scores ( $> 0.9$ ) for AF and bundle branch blocks.  
204 Our model had significantly better predictions than the other models on several CA types,  
205 especially PAC, PVC, STD, and STE. This explained how we outperformed others (S1 Table). It  
206 should be noted that all top models performed well (overall F1-score  $> 0.8$ ) and the difference  
207 between our model and the second-place model was minimal (S1 Table).

## 208 (2) Concurrent CA types

209 One reason for models to perform less accurately on certain CA types is that for some  
210 patients multiple CA types are predicted with almost equal probabilities. Fig 2 displays the  
211 probabilities output by the best validation models for ECG subjects when they were in the test  
212 fold of the 10-fold tests. As may be seen, Normal, STD and STE are three types lacking a  
213 probability score that can make them stand out from the other eight types, in consistence with the  
214 model's performance results presented in Table 1. Further analysis on model probabilities  
215 showed that for many AF patients, a common concurrent CA was RBBB, while many RBBB  
216 patients were often concurrent with PAC and PVC, in addition to AF (Fig 2). These probability  
217 results of concurrent CAs agreed well with the statistics of the 476 multi-labeled subjects:  
218 Namely, the three most multi-labeled incidences in these subjects are AF/RBBB, RBBB/PAC

219 and RBBB/PVC (Table 2). An ensemble model without these 476 multi-labeled subjects being  
220 added back to the training set (see Materials and Methods) performed well in predicting these  
221 multiple CA labels (S3 Table and S4 Table), indicating the model's ability to capture ECG  
222 features of concurrent CAs. These results are also generally compatible with clinical  
223 observations that rate-dependent (phase 3) block during ectopic atrial beats or AF could lead to  
224 RBBB [41] [42]. However, a larger dataset of multi-labeled subjects is required to fully evaluate  
225 our model's performance on concurrent CA diagnosis.

226

227 **Table 2: Label count statistics of the 476 multi-labeled subjects in the released CPSC2018**  
228 **dataset\***

|       | AF | I-AVB | LBBB | RBBB       | PAC       | PVC       | STD | STE |
|-------|----|-------|------|------------|-----------|-----------|-----|-----|
| AF    | 0  | 0     | 29   | <b>172</b> | 4         | 8         | 33  | 2   |
| I-AVB |    | 0     | 8    | 10         | 3         | 5         | 6   | 4   |
| LBBB  |    |       | 0    | 0          | 10        | 6         | 3   | 4   |
| RBBB  |    |       |      | 0          | <b>55</b> | <b>51</b> | 20  | 19  |
| PAC   |    |       |      |            | 2         | 3         | 6   | 5   |
| PVC   |    |       |      |            |           | 0         | 18  | 2   |
| STD   |    |       |      |            |           |           | 0   | 2   |
| STE   |    |       |      |            |           |           |     | 0   |

229 \* Only the upper triangle portion of the symmetrical concurrent CA label counts is shown. The  
230 three largest counts are boldfaced.

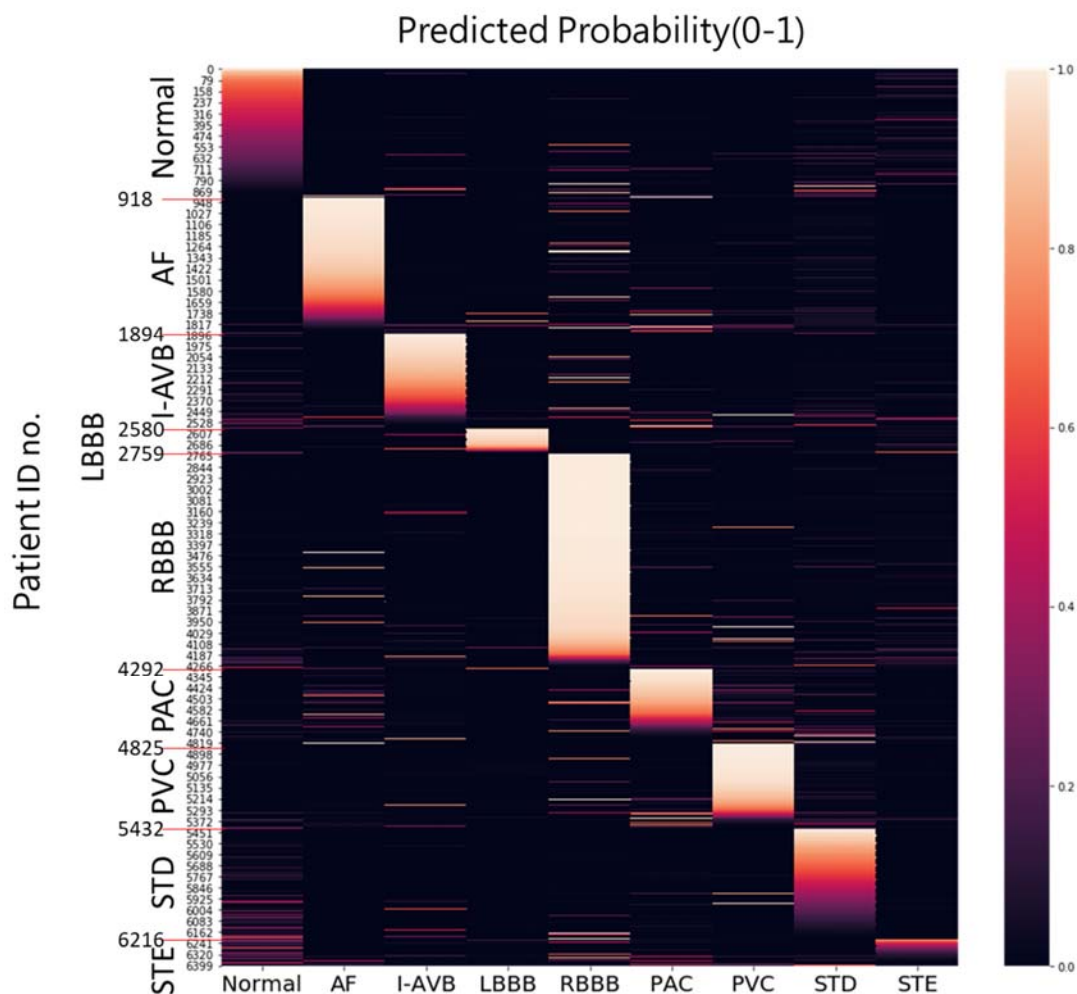

231

232 **Fig 2. Probabilities output by the best validation models in the test fold of the 10-fold test.**

233 On the right is the color-coded probability scale.

234

### 235 (3) Model performances with single lead

236 The median F1-scores for models of a single lead on the 10-fold tests are presented in Fig 3.

237 The performances for the best validation models using the 12-lead data in Table 1 were largely

238 replicated by those using only single-lead data. In most cases, only minimal changes of F1-scores

239 for the classification of individual CA types were noted between the analysis of 12-lead and

240 single-lead ECGs. The results also indicate aVR was one of the best-performing single leads, as  
241 its performance ranked first in overall average and three individual CA types (Normal, AF and  
242 STD), and also within top 3 in all CA types except STE and PAC. Another well-performing  
243 single lead is lead V1, which ranked first in three types (I-AVB, RBBB and PAC), but did worse  
244 than most other leads in some types. In comparison, lead I, which was used by Apple Watch  
245 [43], wasn't as remarkable in our tests. Lead II, the favorite of the 12 leads by physicians to take  
246 a quick look at an ECG recording due to its clearest signal [44], ranked fifth in the overall  
247 average but was statistically no different from the leading leads (p value of paired t-test < 0.05).  
248 These results are largely supported by Bayes factor analysis [45] to rigorously assess statistical  
249 differences between these leads (see S5 Table, S6 Table, S7 Table).

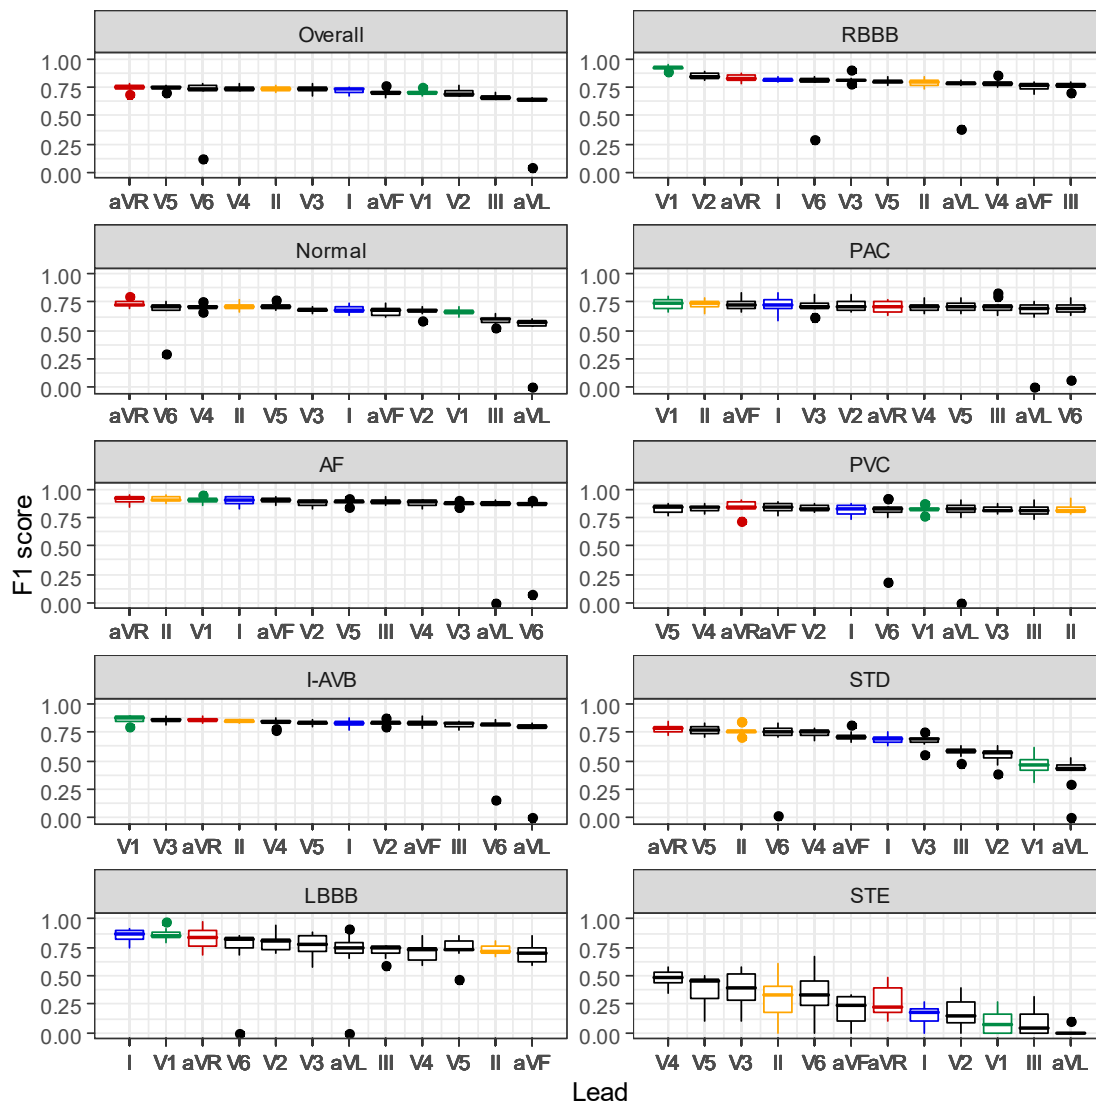

251 **Fig 3. The ranked F1-score results of single lead models.**

252 The F1-scores (on the y axis) are from the single lead models performed on the 10-fold tests (see  
253 Materials and Methods). Lead aVR is shown in red, V1 in green, I in blue, and II in orange.

254



255           These performance rankings suggest the current model identified the lead-specific  
256 morphology of the CA types. For examples, the deep and broad S-waves in lead V1 and the  
257 broad clumsy R-waves in V6 had been used for the diagnosis of LBBB [46], and V1 and V6  
258 were identified among the single leads with the leading performance. Meanwhile, the diagnosis  
259 criteria of RBBB included the rSR' pattern in leads V1 and V2 [47], which were also selected as  
260 top-performing single leads.

261

## 262 **Discussion**

263           Recent years have witnessed a number of successful applications using deep learning of  
264 artificial intelligence (AI) to make medical diagnosis [48]. The present work for CA detection  
265 and classification is related to the competition in CinC2017 [22] and studies that had been  
266 published recently [11, 22]. A direct performance comparison for the different studies is difficult  
267 because not all of them used publicly available ECG data and different CA types and type  
268 numbers had been predicted. The complexities of these deep learning models were also different:  
269 e.g., the total number of neural network layers is 18 in our model, comparing to 33 [11] and 5~7  
270 [22] in others. Nevertheless, all these studies seemed to achieve an overall F1-score around  
271 0.82~0.84. Although not fully tested in the real-world scenario, AI-based ECG diagnosis has  
272 been shown to significantly improve diagnosis accuracy, compared to general physicians and  
273 cardiologists [11, 12] (also see S2 Table for a very small sampling). Therefore, these AI models  
274 are capable of reducing erroneous diagnoses and medical overload. While this is very  
275 encouraging, it is a sobering reminder that until most of the “ground truth” diagnoses used to

276 derive AI models are made by expert cardiologists, there might be a limit to how much model  
277 accuracy can be further improved.

278 Our analyses suggest that models built on single-lead information could predict CA types  
279 with minimal difference of performance from the 12 leads. The clinical diagnostic criteria of CA  
280 types are often lead-specific. The top-ranking single lead for RBBB or LBBB in our model was  
281 compatible with the leads in the diagnostic criteria of RBBB and LBBB [6], solidifying the  
282 validity of the present AI diagnosis model. The performance of aVR, a frequently clinically-  
283 ignored lead, in our AI model is intriguing and deserves attention. The leads I, II, and V1 are  
284 conventionally used as the modified leads in continuous monitoring or mobile device of ECG [43,  
285 49]. In our AI model, aVR could predict a variety of CA types with a better performance than  
286 these conventional leads. The vector of lead aVR is parallel to the anatomical and corresponding  
287 electrical axis from atrial base to ventricular apex, and thus may maximize the electrical signals  
288 of atrial and ventricular depolarization. In comparison, lead I, which is used in Apple Watch for  
289 AF detection [50], did not perform as well in our analysis. Our results suggest the best predictive  
290 single lead for different CA types could be different for clinical applications. Our results may  
291 provide an impetus for future studies to investigate the potential use of lead aVR in different CA  
292 types and ECG devices (wearable or portable).

293 CAs are complex and concurrent CA types are not uncommon, especially for those that are  
294 related in cardiac electrophysiology. Although ECG-based CA diagnosis models have so far  
295 focused only on single-type predictions, our analysis shows that AI is capable of multi-type CA  
296 diagnosis. Detection and classification of concurrent CAs should be a subject for future studies  
297 and our model is a first step in that direction.

298 ECG has been shown capable of disease/health detection beyond CA, including, for  
299 example, the prediction of asymptomatic left ventricular dysfunction [51] and non-invasive  
300 potassium tracking [52]. As methods of AI machine learning continue to be advanced and made  
301 friendlier for non-AI specialists to employ, we can expect ECG to be explored for its diagnostic  
302 power in many more diseases and clinical applications.

303

## 304 **Conclusion**

305

306 We developed a deep learning AI model capable of cardiologist-level CA detection and  
307 classification. The model was derived from a very large 12-lead ECG dataset made available for  
308 free access in a challenge competition to promote open-source research. Besides achieving the  
309 first placebest performance in the competition, the model was shown to yield promising results  
310 for two aspects worthy of future investigations in the field: concurrent CA diagnosis and use of  
311 less attended single leads such as aVR in clinical applications.

312

313

314

315

316 **Acknowledgements:** We thankfully acknowledge the CPSC Challenge Chair Prof. Chengyu Liu  
317 and his conference coworkers for their help and making the ECG data publicly available.

318

319 **Data Availability Statement:** All relevant data are at <http://2018.icbeb.org/Challenge.html>.

320

321 **Funding:** The research of Hwang lab is supported by Institute of Biomedical Sciences,  
322 Academia Sinica, and Ministry of Science and Technology, Taiwan, grant number MOST108-  
323 2311-B-001-017.

324

325 **Competing interests:** All authors have declared that no competing interests exist

326

327 **Author Contributions:**

328 Conceptualization: Tsai-Min Chen, Chih-Han Huang, Edward S. C. Shih, Ming-Jing Hwang.

329 Data curation: Tsai-Min Chen, Chih-Han Huang.

330 Formal analysis: Tsai-Min Chen, Edward S. C. Shih.

331 Funding Acquisition: Ming-Jing Hwang.

332 Investigation: Tsai-Min Chen, Chih-Han Huang, Edward S. C. Shih.

333 Methodology: Tsai-Min Chen, Chih-Han Huang, Edward S. C. Shih, Ming-Jing Hwang.

334 Project Administration: Yu-Feng Hu, Ming-Jing Hwang.

335 Resources: Yu-Feng Hu, Tsai-Min Chen.

336 Software: Tsai-Min Chen, Chih-Han Huang, Edward S. C. Shih.

337 Supervision: Yu-Feng Hu, Ming-Jing Hwang.

338 Validation: Yu-Feng Hu, Chih-Han Huang, Edward S. C. Shih.

339 Visualization: Tsai-Min Chen, Edward S. C. Shih.

340 Writing – Original Draft Preparation: Tsai-Min Chen, Chih-Han Huang, Edward S. C. Shih, Yu-  
341 Feng Hu, Ming-Jing Hwang.

342 Writing – Review & Editing: Tsai-Min Chen, Chih-Han Huang, Edward S. C. Shih, Yu-Feng Hu,  
343 Ming-Jing Hwang.

344

## 345 **References**

346

- 347 1. Kibos AS, Knight BP, Essebag V, Fishberger SB, Slevin M, Țintoiu IC. Cardiac  
348 Arrhythmias: From Basic Mechanism to State-of-the-Art Management: Springer London; 2013.
- 349 2. Malmivuo P, Malmivuo J, Plonsey R. Bioelectromagnetism: principles and applications  
350 of bioelectric and biomagnetic fields: Oxford University Press, USA; 1995.
- 351 3. Wilson FN, Kossmann CE, Burch GE, Goldberger E, Graybiel A, Hecht HH, et al.  
352 Recommendations for standardization of electrocardiographic and vectorcardiographic leads.  
353 *Circulation*. 1954;10(4):564-73.
- 354 4. Bayes de Luna A, Cladellas M, Oter R, Torner P, Guindo J, Marti V, et al. Interatrial  
355 conduction block and retrograde activation of the left atrium and paroxysmal supraventricular  
356 tachyarrhythmia. *European heart journal*. 1988;9(10):1112-8.
- 357 5. Platonov PG, Cygankiewicz I, Stridh M, Holmqvist F, Vazquez R, Bayes-Genis A, et al.  
358 Low atrial fibrillatory rate is associated with poor outcome in patients with mild to moderate  
359 heart failure. *Circulation: Arrhythmia and Electrophysiology*. 2012;5(1):77-83.
- 360 6. Surawicz B, Childers R, Deal BJ, Gettes LS. AHA/ACCF/HRS recommendations for the  
361 standardization and interpretation of the electrocardiogram: part III: intraventricular conduction  
362 disturbances a scientific statement from the American Heart Association Electrocardiography  
363 and Arrhythmias Committee, Council on Clinical Cardiology; the American College of  
364 Cardiology Foundation; and the Heart Rhythm Society endorsed by the International Society for  
365 Computerized Electrocardiology. *Journal of the American College of Cardiology*.  
366 2009;53(11):976-81.
- 367 7. Wesley K. Huszar's ECG and 12-Lead Interpretation - E-Book: Elsevier Health Sciences;  
368 2016.

- 369 8. Kobayashi Y. Idiopathic Ventricular Premature Contraction and Ventricular Tachycardia:  
370 Distribution of the Origin, Diagnostic Algorithm, and Catheter Ablation. *Journal of Nippon*  
371 *Medical School*. 2018;85(2):87-94.
- 372 9. Garcia T, Miller G. *Arrhythmia Recognition: The Art of Interpretation*: Jones & Bartlett  
373 Learning; 2004.
- 374 10. Hanna EB, Glancy DL. ST-segment depression and T-wave inversion: classification,  
375 differential diagnosis, and caveats. *Cleveland Clinic journal of medicine*. 2011;78(6):404.
- 376 11. Hannun AY, Rajpurkar P, Haghpanahi M, Tison GH, Bourn C, Turakhia MP, et al.  
377 Cardiologist-level arrhythmia detection and classification in ambulatory electrocardiograms  
378 using a deep neural network. *Nature medicine*. 2019;25(1):65.
- 379 12. Shiyovich A, Wolak A, Yacobovich L, Grosbard A, Katz A. Accuracy of diagnosing  
380 atrial flutter and atrial fibrillation from a surface electrocardiogram by hospital physicians:  
381 analysis of data from internal medicine departments. *The American journal of the medical*  
382 *sciences*. 2010;340(4):271-5.
- 383 13. Hoekema R, Uijen GJ, Van Oosterom A. Geometrical aspects of the interindividual  
384 variability of multilead ECG recordings. *IEEE Transactions on Biomedical Engineering*.  
385 2001;48(5):551-9.
- 386 14. Lyon A, Mincholé A, Martínez JP, Laguna P, Rodriguez B. Computational techniques for  
387 ECG analysis and interpretation in light of their contribution to medical advances. *Journal of The*  
388 *Royal Society Interface*. 2018;15(138):20170821.
- 389 15. Qin Q, Li J, Zhang L, Yue Y, Liu C. Combining Low-dimensional Wavelet Features and  
390 Support Vector Machine for Arrhythmia Beat Classification. *Scientific reports*. 2017;7(1):6067.

- 391 16. Goldberger AL, Amaral LA, Glass L, Hausdorff JM, Ivanov PC, Mark RG, et al.  
392 PhysioBank, PhysioToolkit, and PhysioNet: components of a new research resource for complex  
393 physiologic signals. *Circulation*. 2000;101(23):e215-e20.
- 394 17. Moody GB, Mark RG. The impact of the MIT-BIH arrhythmia database. *IEEE*  
395 *Engineering in Medicine and Biology Magazine*. 2001;20(3):45-50.
- 396 18. Guvenir HA, Acar B, Demiroz G, Cekin A. Supervised machine learning algorithm for  
397 arrhythmia analysis. *Computers in cardiology*. 1997:433-6.
- 398 19. Begg R. *Neural Networks in Healthcare: Potential and Challenges: Potential and*  
399 *Challenges*: IGI Global; 2006.
- 400 20. Mustaqeem A, Anwar SM, Majid M. Multiclass Classification of Cardiac Arrhythmia  
401 Using Improved Feature Selection and SVM Invariants. *Computational and mathematical*  
402 *methods in medicine*. 2018;2018.
- 403 21. NAYAK CG, Seshikala G, Desai U, Nayak SG. Identification of arrhythmia classes using  
404 machine-learning techniques. *International Journal of Biology and Biomedicine*. 2016;1:48-53.
- 405 22. Clifford GD, Liu C, Moody B, Lehman L-wH, Silva I, Li Q, et al. AF classification from  
406 a short single lead ECG recording: The Physionet Computing in Cardiology Challenge 2017.  
407 *Proceedings of Computing in Cardiology*. 2017;44:1.
- 408 23. Xiong Z, Nash MP, Cheng E, Fedorov VV, Stiles MK, Zhao J. ECG signal classification  
409 for the detection of cardiac arrhythmias using a convolutional recurrent neural network.  
410 *Physiological measurement*. 2018.
- 411 24. Liu F, Liu C, Zhao L, Zhang X, Wu X, Xu X, et al. An Open Access Database for  
412 Evaluating the Algorithms of Electrocardiogram Rhythm and Morphology Abnormality



- 413 Detection. *Journal of Medical Imaging and Health Informatics*. 2018;8(7):1368-73. doi:  
414 10.1166/jmihi.2018.2442.
- 415 25. Liu F, Liu C, Zhao L, Zhang X, Wu X, Xu X, et al. An Open Access Database for  
416 Evaluating the Algorithms of Electrocardiogram Rhythm and Morphology Abnormality  
417 Detection. *Journal of Medical Imaging and Health Informatics*. 2018;8(7):1368-73.
- 418 26. Yang Z, Yang D, Dyer C, He X, Smola AJ, Hovy EH, editors. Hierarchical Attention  
419 Networks for Document Classification. HLT-NAACL; 2016.
- 420 27. Schuster M, Paliwal KK. Bidirectional recurrent neural networks. *Ieee Transactions on*  
421 *Signal Processing*. 1997;45(11):2673-81. doi: Doi 10.1109/78.650093. PubMed PMID:  
422 WOS:A1997YE90500005.
- 423 28. Hearty J. *Advanced Machine Learning with Python*: Packt Publishing; 2016.
- 424 29. Rutkowski L. *Computational Intelligence: Methods and Techniques*: Springer Berlin  
425 Heidelberg; 2008.
- 426 30. Pal A, Prakash P. *Practical Time Series Analysis: Master Time Series Data Processing,*  
427 *Visualization, and Modeling using Python*: Packt Publishing; 2017.
- 428 31. Cho K, Van Merriënboer B, Bahdanau D, Bengio Y. On the properties of neural machine  
429 translation: Encoder-decoder approaches. arXiv preprint arXiv:14091259. 2014.
- 430 32. Chung J, Gulcehre C, Cho K, Bengio Y. Empirical evaluation of gated recurrent neural  
431 networks on sequence modeling. arXiv preprint arXiv:14123555. 2014.
- 432 33. Ioffe S, Szegedy C. Batch normalization: Accelerating deep network training by reducing  
433 internal covariate shift. arXiv preprint arXiv:150203167. 2015.
- 434 34. Maas AL, editor *Rectifier Nonlinearities Improve Neural Network Acoustic Models*2013.

- 435 35. Kingma DP, Ba J. Adam: A Method for Stochastic Optimization. ArXiv e-prints  
436 [Internet]. 2014 December 1, 2014; 1412. Available from:  
437 <http://adsabs.harvard.edu/abs/2014arXiv1412.6980K>.
- 438 36. Abadi M, Agarwal A, Barham P, Brevdo E, Chen Z, Citro C, et al. TensorFlow: Large-  
439 Scale Machine Learning on Heterogeneous Distributed Systems. ArXiv e-prints [Internet]. 2016  
440 March 1, 2016; 1603. Available from: <http://adsabs.harvard.edu/abs/2016arXiv160304467A>.
- 441 37. Charles PWD. Project Title. GitHub repository.  
442 2013;<https://github.com/charlespwd/project-title>.
- 443 38. Pedregosa F, Varoquaux G, Gramfort A, Michel V, Thirion B, Grisel O, et al. Scikit-  
444 learn: Machine Learning in Python. Journal of Machine Learning Research. 2011;12:2825-30.  
445 PubMed PMID: WOS:000298103200003.
- 446 39. Goldberg DE, editor Genetic Algorithms in Search Optimization and Machine  
447 Learning 1989.
- 448 40. McCabe JM, Armstrong EJ, Ku I, Kulkarni A, Hoffmayer KS, Bhave PD, et al. Physician  
449 accuracy in interpreting potential ST-segment elevation myocardial infarction  
450 electrocardiograms. Journal of the American Heart Association. 2013;2(5):e000268.
- 451 41. Nielsen JB, Olesen MS, Tangø M, Haunsø S, Holst AG, Svendsen JH. Incomplete right  
452 bundle branch block: a novel electrocardiographic marker for lone atrial fibrillation. Europace.  
453 2010;13(2):182-7.
- 454 42. Gertsch M. The ECG Manual: An Evidence-Based Approach: Springer London; 2016.
- 455 43. Apple. Taking an ECG with the ECG app on Apple Watch Series 4 2019 [cited 2019  
456 4/20]. Available from: <https://support.apple.com/hr-hr/HT208955>.

- 457 44. Beebe R, Myers J. Professional Paramedic, Volume I: Foundations of Paramedic Care:  
458 Cengage Learning; 2012.
- 459 45. Goodman SN. Toward evidence-based medical statistics. 2: The Bayes factor. *Annals of*  
460 *internal medicine*. 1999;130(12):1005-13.
- 461 46. Podrid P, Rajeev Malhotra MDMS, Kakkar R, Noseworthy PA. Podrid's Real-World  
462 ECGs: Volume 4B, Arrhythmias [Practice Cases]: A Master's Approach to the Art and Practice  
463 of Clinical ECG Interpretation: Cardiotext Publishing; 2015.
- 464 47. Chugh S. *Textbook of Clinical Electrocardiography*: Jaypee Brothers; 2014.
- 465 48. Esteva A, Robicquet A, Ramsundar B, Kuleshov V, DePristo M, Chou K, et al. A guide  
466 to deep learning in healthcare. *Nature medicine*. 2019;25(1):24.
- 467 49. Brunner LS, Smeltzer SCOC, Bare BG, Hinkle JL, Cheever KH. *Brunner & Suddarth's*  
468 *Textbook of Medical-surgical Nursing*: Wolters Kluwer Health/Lippincott Williams & Wilkins;  
469 2010.
- 470 50. Krueger AC. FDA document of Electrocardiograph software for over-the-counter use  
471 2018 [cited 2018 October 17]. Available from:  
472 [https://www.accessdata.fda.gov/cdrh\\_docs/pdf18/DEN180044.pdf](https://www.accessdata.fda.gov/cdrh_docs/pdf18/DEN180044.pdf).
- 473 51. Attia ZI, Kapa S, Lopez-Jimenez F, McKie PM, Ladewig DJ, Satam G, et al. Screening  
474 for cardiac contractile dysfunction using an artificial intelligence-enabled electrocardiogram.  
475 *Nature medicine*. 2019;25(1):70.
- 476 52. Attia ZI, DeSimone CV, Dillon JJ, Sapir Y, Somers VK, Dugan JL, et al. Novel  
477 Bloodless Potassium Determination Using a Signal-Processed Single-Lead ECG. *Journal of the*  
478 *American Heart Association*. 2016;5(1):e002746.
- 479  
480

481

482

483 **Supporting information captions**

484 **S1 Table. CPSC2018's top 10 models and results (reported by the conference on**  
485 **<http://2018.icbeb.org/Challenge.html>)\***

486 **S2 Table. Comparisons on CA diagnosis between conference-assigned label, our model**  
487 **prediction, and consensus from three expert cardiologists.**

488 **S3 Table. The performances of models trained without multi-labeled data\***

489 **S4 Table. Successfully predicted CA types for the 476 multi-labeled subjects in the released**  
490 **dataset of CPSC2018\***

491 **S5 Table. The Bayes factors\* (in log scale) of each lead's performance (F1 score) relative to**  
492 **that of the best performing lead in each CA type (see Fig. 3)**

493 **S6 Table. Leads in the top-performing group (threshold: Bayes factor<3.0)\***

494 **S7 Table. Leads in the top-performing group (threshold: Bayes factor<0.33)\***

**S1 Table.** CPSC2018's top 10 models and results (reported by the conference on <http://2018.icbeb.org/Challenge.html>)\*

| Rank     | Overall F1   | F <sub>af</sub> | F <sub>block</sub> | F <sub>pc</sub> | F <sub>st</sub> |
|----------|--------------|-----------------|--------------------|-----------------|-----------------|
| <b>1</b> | <b>0.837</b> | <b>0.933</b>    | <b>0.899</b>       | <b>0.847</b>    | <b>0.779</b>    |
| 2        | 0.830        | 0.931           | 0.912              | 0.817           | 0.761           |
| 3        | 0.806        | 0.914           | 0.879              | 0.801           | 0.742           |
| 4        | 0.802        | 0.918           | 0.89               | 0.789           | 0.718           |
| 5        | 0.791        | 0.924           | 0.882              | 0.779           | 0.709           |
| 6        | 0.783        | 0.905           | 0.902              | 0.722           | 0.708           |
| 7        | 0.782        | 0.911           | 0.891              | 0.775           | 0.670           |
| 8        | 0.778        | 0.921           | 0.858              | 0.797           | 0.676           |
| 9        | 0.776        | 0.906           | 0.876              | 0.773           | 0.711           |
| 10       | 0.766        | 0.894           | 0.857              | 0.733           | 0.683           |

\*Our team's results are ranked first (boldfaced), and the highest scores of each sub-competition are indicated in red color. Overall F1 is the average of the F1 values from each classification type. F<sub>af</sub>: F1 of AF; F<sub>block</sub>: F1 of I-AVB, LBBB and RBBB; F<sub>pc</sub>: F1 of PAC and PVC; F<sub>st</sub>: F1 of STD and STE.

**S2 Table.** Comparisons on CA diagnosis between conference-assigned label, our model prediction, and consensus from three expert cardiologists.

| PatientID | Conf.  | Model  | Cardiologist1                                | Cardiologist2                                               | Cardiologist3 | Consensus |
|-----------|--------|--------|----------------------------------------------|-------------------------------------------------------------|---------------|-----------|
| 6268      | STE    | Normal | Normal                                       | SR (normal)                                                 | SR (normal)   | Normal    |
| 6215      | STD    | AF     | narrow-QRS<br>tachycardia, SVT,<br>RBBB, RAD | PSVT                                                        | PSVT          | PSVT      |
| 4237      | RBBB   | I-AVB  | I-AVB                                        | I-AVB, SR, TWI (V1-V4), rSR' (V1)                           | I-AVB,SR      | I-AVB     |
| 6380      | STE    | LBBB   | LBBB                                         | LBBB,SR,LAE                                                 | LBBB,SR       | LBBB      |
| 1452      | AF     | RBBB   | AF, MVR, RBBB                                | AF, RBBB, Q wave, STE with<br>reciprocal change, w/o old MI | AF, RBBB      | RBBB      |
| 5398      | PVC    | PAC    | PAC                                          | PAC                                                         | PAC,SR        | PAC       |
| 5963      | STD    | PVC    | PVC                                          | PVC,SR,STD(V3-V6)                                           | PVC,SR        | PVC       |
| 4278      | RBBB   | STD    | normal                                       | SR, minimal STTC(II, III, aVF)                              | STD-like, SR  | Normal    |
| 504       | Normal | STE    | STE-like                                     | SR, early repolarization                                    | SR            | Normal    |

Conference assignments (regarded as ‘ground truth’ for model training) or our model predictions in agreement with the consensus of the three expert cardiologists are highlighted in red. SVT: Supraventricular tachycardia; RAD: Right Axis Deviation; MVR: mitral valve

replacement; SR: sinus rhythm; PSVT: Paroxysmal supraventricular tachycardia; LAE: left atrial enlargement; MI: myocardial infarction; STTC: ST-T change

**S3 Table. The performances of models trained without multi-labeled data\***

| CA Type | Best Validation Models |                        |                 | Ensemble Model  |                        |                 |
|---------|------------------------|------------------------|-----------------|-----------------|------------------------|-----------------|
|         | Median Accuracy        | Median AUC (95% CI)    | Median F1-score | Median Accuracy | Median AUC (95% CI)    | Median F1-score |
| Normal  | 0.940                  | 0.908<br>(0.791-0.916) | 0.807           | 0.937           | 0.901<br>(0.808-0.932) | 0.794           |
| AF      | 0.974                  | 0.949<br>(0.885-0.992) | 0.915           | 0.980           | 0.955<br>(0.929-0.995) | 0.935           |
| I-AVB   | 0.973                  | 0.918<br>(0.852-0.991) | 0.876           | 0.976           | 0.912<br>(0.900-0.996) | 0.879           |
| LBBB    | 0.993                  | 0.927<br>(0.748-1.000) | 0.870           | 0.993           | 0.913<br>(0.770-1.000) | 0.862           |
| RBBB    | 0.961                  | 0.954<br>(0.895-0.981) | 0.922           | 0.944           | 0.925<br>(0.880-0.972) | 0.885           |
| PAC     | 0.957                  | 0.852<br>(0.747-0.961) | 0.747           | 0.965           | 0.889<br>(0.798-0.984) | 0.796           |
| PVC     | 0.973                  | 0.926<br>(0.832-0.989) | 0.858           | 0.974           | 0.950<br>(0.820-0.992) | 0.870           |
| STD     | 0.950                  | 0.869<br>(0.800-0.966) | 0.786           | 0.956           | 0.914<br>(0.790-0.950) | 0.821           |
| STE     | 0.974                  | 0.667<br>(0.491-0.995) | 0.394           | 0.975           | 0.663<br>(0.491-0.995) | 0.444           |

\* In these models, the 476 multi-labeled recordings were not included in the training set. These are results of the best validation models and the ensemble model on the ten 10-fold tests. These performances are comparable with those presented in Table 1.



**S4 Table. Successfully predicted CA types for the 476 multi-labeled subjects in the released dataset of CPSC2018\***

|       | AF  | I-AVB | LBBB  | RBBB           | PAC          | PVC          | STD   | STE  |
|-------|-----|-------|-------|----------------|--------------|--------------|-------|------|
| AF    | 0/0 | 0/0   | 17/29 | <b>154/172</b> | 0/4          | 6/8          | 4/33  | 0/2  |
| I.AVB |     | 0/0   | 2/8   | 8/10           | 0/3          | 2/5          | 0/6   | 0/4  |
| LBBB  |     |       | 0/0   | 0/0            | 2/10         | 4/6          | 0/3   | 0/4  |
| RBBB  |     |       |       | 0/0            | <b>34/55</b> | <b>49/51</b> | 16/20 | 5/19 |
| PAC   |     |       |       |                | 0/0          | 3/3          | 4/6   | 2/5  |
| PVC   |     |       |       |                |              | 0/0          | 6/18  | 0/2  |
| STD   |     |       |       |                |              |              | 0/0   | 2/2  |
| STE   |     |       |       |                |              |              |       | 0/0  |

\* Only the upper triangle portion of the symmetrical concurrent CA label counts is shown. The numbers shown are the number of correctly predicted subjects / the total multi-labeled subjects for a given CA type. The two CA types with the highest and the second highest probabilities are the predicted concurrent CA types. Boldfaced are the three most concurrent CA labels in these subjects (see Table 2).

**S5 Table. The Bayes factors\* (in log scale) of each lead's performance (F1 score)**

**relative to that of the best performing lead in each CA type (see Fig. 3)**

|        | I    | II   | III  | aVR  | aVL  | aVF  | V1   | V2   | V3   | V4   | V5   | V6   |
|--------|------|------|------|------|------|------|------|------|------|------|------|------|
| Normal | 3.4  | 0.3  | 14.1 | -0.9 | 3.1  | 4.1  | 7.3  | 5.3  | 5.0  | 0.9  | 0.4  | -0.1 |
| AF     | -0.8 | -0.8 | -0.6 | -0.9 | -0.3 | -0.7 | -0.9 | 0.2  | 1.1  | 0.8  | -0.3 | -0.2 |
| I-AVB  | 1.2  | 0.1  | 3.7  | -0.4 | 0.1  | 0.8  | -0.9 | 1.3  | -0.5 | 0.5  | 1.1  | -0.1 |
| LBBB   | -0.9 | 6.1  | 6.4  | -0.8 | 0.4  | 6.1  | -0.9 | 0.2  | 1.0  | 3.8  | 1.9  | -0.1 |
| RBBB   | 18.3 | 15.5 | 22.2 | 11.4 | 4.1  | 18.8 | -0.9 | 9.9  | 12.9 | 16.0 | 18.6 | 1.8  |
| PAC    | -0.9 | -0.9 | -0.6 | -0.3 | -0.1 | -0.9 | -0.9 | -0.8 | -0.7 | -0.2 | -0.4 | -0.2 |
| PVC    | -0.8 | -0.9 | -0.8 | -0.8 | -0.6 | -0.9 | -0.9 | -0.9 | -0.9 | -0.9 | -0.9 | -0.6 |
| STD    | 6.0  | -0.9 | 15.4 | -0.9 | 10.2 | 2.4  | 14.9 | 11.9 | 5.6  | 0.6  | -0.8 | -0.5 |
| STE    | 11.9 | 1.7  | 11.3 | 3.7  | 23.1 | 6.7  | 12.2 | 7.1  | 0.3  | -0.9 | 0.4  | 0.8  |

\*computed using the 'BayesFactor' routine in the R package.

**S6 Table. Leads in the top-performing group (threshold: Bayes factor<3.0)\***

|        | I | II       | III | aVR      | aVL | aVF | V1       | V2 | V3 | V4 | V5       | V6       |
|--------|---|----------|-----|----------|-----|-----|----------|----|----|----|----------|----------|
| Normal | 0 | 1        | 0   | 1        | 0   | 0   | 0        | 0  | 0  | 0  | 1        | 1        |
| AF     | 1 | 1        | 1   | 1        | 1   | 1   | 1        | 1  | 0  | 0  | 1        | 1        |
| I-AVB  | 0 | 1        | 0   | 1        | 1   | 0   | 1        | 0  | 1  | 0  | 0        | 1        |
| LBBB   | 1 | 0        | 0   | 1        | 1   | 0   | 1        | 1  | 0  | 0  | 0        | 1        |
| RBBB   | 0 | 0        | 0   | 0        | 0   | 0   | 1        | 0  | 0  | 0  | 0        | 0        |
| PAC    | 1 | 1        | 1   | 1        | 1   | 1   | 1        | 1  | 1  | 1  | 1        | 1        |
| PVC    | 1 | 1        | 1   | 1        | 1   | 1   | 1        | 1  | 1  | 1  | 1        | 1        |
| STD    | 0 | 1        | 0   | 1        | 0   | 0   | 0        | 0  | 0  | 0  | 1        | 1        |
| STE    | 0 | 0        | 0   | 0        | 0   | 0   | 0        | 0  | 1  | 1  | 1        | 0        |
| Total  | 4 | <b>6</b> | 3   | <b>7</b> | 5   | 3   | <b>6</b> | 4  | 4  | 3  | <b>6</b> | <b>7</b> |

\*The leads in the top-performing group, indicated by 1 (0 for those excluded from this group), for a given CA type are considered to perform equally well statistically based on the threshold of Bayes factor<3.0, which indicates the null hypothesis of no difference from the leading lead holds. Using this threshold, the sum total shows that leads aVR and V6 received most top-performing group counts, followed by leads II, V1, and V5.

**S7 Table. Leads in the top-performing group (threshold: Bayes factor<0.33)\***

|        | I | II | III | aVR      | aVL | aVF | V1       | V2 | V3 | V4 | V5 | V6 |
|--------|---|----|-----|----------|-----|-----|----------|----|----|----|----|----|
| Normal | 0 | 0  | 0   | 1        | 0   | 0   | 0        | 0  | 0  | 0  | 0  | 0  |
| AF     | 1 | 1  | 1   | 1        | 0   | 1   | 1        | 0  | 0  | 0  | 0  | 0  |
| I-AVB  | 0 | 0  | 0   | 0        | 0   | 0   | 1        | 0  | 1  | 0  | 0  | 0  |
| LBBB   | 1 | 0  | 0   | 1        | 0   | 0   | 1        | 0  | 0  | 0  | 0  | 0  |
| RBBB   | 0 | 0  | 0   | 0        | 0   | 0   | 1        | 0  | 0  | 0  | 0  | 0  |
| PAC    | 1 | 1  | 1   | 0        | 0   | 1   | 1        | 1  | 1  | 0  | 0  | 0  |
| PVC    | 1 | 1  | 1   | 1        | 1   | 1   | 1        | 1  | 1  | 1  | 1  | 1  |
| STD    | 0 | 1  | 0   | 1        | 0   | 0   | 0        | 0  | 0  | 0  | 1  | 1  |
| STE    | 0 | 0  | 0   | 0        | 0   | 0   | 0        | 0  | 0  | 1  | 0  | 0  |
| Total  | 4 | 4  | 3   | <b>5</b> | 1   | 3   | <b>6</b> | 2  | 3  | 2  | 2  | 2  |

\*The leads in the top-performing group, indicated by 1 (0 for those excluded from this group), for a given CA type are considered to perform equally well statistically based on the threshold of Bayes factor<0.03, which indicates the null hypothesis of no difference from the leading lead holds. Using this threshold, the sum total shows that lead V1 received most top-performing group counts, followed by lead aVR.
